# Supplementary material for: Risk factors for mortality in patients undergoing peritoneal dialysis: a systematic review and meta-analysis
Source: PubMed Central journal article supplement — Ren Fail. 2021 Apr 29;43(1):743–53. doi: 10.1080/0886022X.2021.1918558 (PMC8901278; doi:10.1080/0886022x.2021.1918558), 2021-04-29
Supplement: IRNF_A_1918558_SM0283.pdf [file IRNF_A_1918558_SM0283.pdf]

Search terms for PubMed:

((((((((peritoneal dialysis) OR (renal dialysis)) OR (renal replacement therapy)) OR (chronic kidney disease)) OR (end-stage renal disease)) OR (ESRD)) AND (((mortality) OR (death)) OR (survival))) AND ((((((potassium) OR (magnesium)) OR (peritonitis)) OR (body mass index)) OR (albumin)) OR (hemoglobin))) AND (Clinical Trial) [ptyp]

Search terms for Embase:

#1 'peritoneal dialysis'/exp

#2((((dialysis, AND peritoneal:ab,ti OR intermittent) AND peritoneal AND dialysis:ab,ti OR peritoneal) AND dialysis:ab,ti OR intermittent:ab,ti OR peritoneum) AND dialysis:ab,ti OR peritoneum) AND inigation:ab,ti

#3#1 OR #2

#4'chronic kidney failure'/exp

#5((((((((((((chronic AND kidney AND disease:ab,ti OR chronic) AND kidney AND disorder:ab,ti OR chronic) AND kidney AND insufficiency:ab,ti OR chronic) AND nephropathy:ab,ti OR chronic) AND renal AND disease:ab,ti OR chronic) AND renal AND failure:ab,ti OR chronic) AND renal AND insufficiency:ab,ti OR kidney) AND chronic AND failure:ab,ti OR kidney) AND disease, AND chronic:ab,ti OR kidney) AND failure, AND chronic:ab,ti OR kidney) AND function, AND chronic AND disease:ab,ti OR renal) AND insufficiency, AND chronic:ab,ti

#6#4 OR #5

#7(excess AND mortality:ab,ti OR mortality) AND model:ab,ti

#8'mortality'/exp

#9#7 OR #8

#10'potassium'/exp

#11(((k AND 39:ab,ti OR potassium) AND content:ab,ti OR potassium) AND isotopes:ab,ti OR potassium) AND radioisotopes:ab,ti OR kalium:ab,ti

#12#10 OR #11

#13'magnesium'/exp

#14mg:ab,ti OR romag:ab,ti

#15#13 OR #14

#16'peritonitis'/exp

#17((((diffuse AND peritonitis:ab,ti OR intraperitoneal) AND infection:ab,ti OR peritoneal) AND infection:ab,ti OR perivisceritis:ab,ti OR secondary) AND peritonitis:ab,ti

#18#16 OR #17

#19'body mass'/exp

#20((((bmi AND body:ab,ti AND mass:ab,ti AND index:ab,ti OR body) AND ban AND mass:ab,ti OR body) AND mass AND index:ab,ti OR quetelet) AND index:ab,ti

#21#19 OR #20

#22'albumin'/exp

#23((((albumen:ab,ti OR albumin) AND secretion:ab,ti OR albumin) AND variant:ab,ti OR liquid) AND albumin:ab,ti

#24#22 OR #23

#25'hemoglobin'/exp

#26haemoglobin:ab,ti OR hb:ab,ti OR hemoglobins:ab,ti OR hemoglobulin:ab,ti

#27#25 OR #26

#28#3 OR #6

#29#12 OR #15 OR #18 OR #21 OR #24 OR #27

#30#9 AND #28 AND #29

#31#30 AND (2000:py OR 2001:py OR 2002:py OR 2003:py OR 2004:py OR 2005:py OR 2006:py OR 2007:py OR 2008:py OR 2009:py OR 2010:py OR 2011:py OR 2012:py OR 2013:py OR 2014:py OR 2015:py OR 2016:py OR 2017:py OR 2018:py OR 2019:py OR 2020:py) AND ('clinical article'/de OR 'clinical study'/de OR 'cross sectional study'/de OR 'longitudinal study'/de OR 'multicenter study'/de OR 'observational study'/de OR 'proportional hazards model'/de OR 'prospective study'/de OR 'retrospective study'/de)
